# Supplementary material
Source: PubMed Central journal article supplement (PMC6583548)
Supplement: jamaophthalmol-135-1394-s001.pdf [file jamaophthalmol-135-1394-s001.pdf]

## Supplementary Online Content

Lass JH, Benetz BA, Verdier DD, et al; Cornea Preservation Time Study Group. Corneal endothelial cell loss 3 years after successful Descemet stripping automated endothelial keratoplasty in the Cornea Preservation Time Study. *JAMA Ophthalmol*. Published online November 10, 2017. doi:10.1001/jamaophthalmol.2017.4970

**eAppendix 1.** Cornea Preservation Time Study Group: Clinical Sites

**eAppendix 2.** Institutional Review Boards

**eTable 1.** Quality Control Repeat Grading Results

**eTable 2.** Baseline Recipient Characteristics in Eyes with Graft Success

**eTable 3.** CPTS Donor Characteristics in Eyes with Graft Success

**eTable 4.** Four Year Endothelial Cell Density (cells/mm<sup>2</sup>) in Eyes with Graft Success

This supplementary material has been provided by the authors to give readers additional information about their work.

## **eAppendix 1. Cornea Preservation Time Study Group**

### **Clinical Sites**

Listed in order of number of patients enrolled in the CPTS are the clinical sites with site name, city, state, number of eyes enrolled (in parentheses), name of the principal investigator, and other investigators ordered alphabetically. The names of the coordinators ordered alphabetically are also included.

**Central Pennsylvania Eye Institute, Hershey, PA (220).** Investigators: George Rosenwasser, MD (PI), J.E.B. Fugate, OD. Coordinators: Alicia Burrows, Miriam Rosenwasser.

**Verdier Eye Center, Grand Rapids, MI (107).** Investigators: David Verdier, MD (PI), Mary Pat Chelsky, OD, Lyndsay Tomkins, OD. Coordinators: Samantha Ciganick, Paula Johnson, Devon Keeler, Brent Spoelstra, Pamela Van Duyn.

**Cornea Associates of Texas, Dallas, TX (66).** Investigators: Tyrone McCall, MD (PI), Walter Beebe, MD, Charles Bowman, MD, Aaleya Koreishi, MD. Coordinators: Paige Grona, Jennifer Hargrove, Maria Mendez.

**University of Michigan/Kellogg Eye Center, Ann Arbor, MI (62).** Investigators: Alan Sugar, MD (PI), Shahzad Mian, MD. Coordinators: Munira Hussain, Sonal Trivedi.

**Michigan Cornea Consultants, Southfield, MI (59).** Investigators: Steven Dunn, MD (PI), Christopher Chow, MD, David Heidemann, MD. Coordinators: Elizabeth Brazier, Elly Garden, Tina MacLeod.

**Mid-Atlantic Cornea Consultants, Baltimore, MD (58).** Investigator: Sudeep Pramanik, MD (PI). Coordinators: Jessica Byer, Jennifer Freter, Hillary Herman.

**Northeast Ohio Eye Surgeons, Kent, OH (52).** Investigators: Marc Jones, MD (PI), Katie Greiner, OD, Elizabeth Muckley, OD. Coordinator: John Valentine.

**Devers Eye Institute, Portland, Oregon (50).** Investigators: Mark Terry, MD (PI), Mike Straiko, MD. Coordinators: David Davis-Boozer, Mark Greiner, Zachary Mayko, Kelsey Oakes.

**Dean Medical Center, Madison, WI (41).** Investigator: Christopher Croasdale, MD (PI), Coordinators: Lynn Dombrowicki, Michelle Kole, Gayle Walheim-Brown.

**Eye Associates Northwest, Seattle, WA (40).** Investigator: Thomas Gillette, MD (PI). Coordinators: Jennifer Caillier, Michelle Corrigan, David Diaz, Christine Morchin.

**Mercy-St. John's Clinic, Springfield, Missouri (39).** Investigators: Shachar Tauber, MD (PI), Alison Hood-Kirar, OD. Coordinator: Crystal Trythall.

**Focal Point Vision, San Antonio, TX (38).** Investigators: Kenneth Maverick, MD (PI), James Lehmann, MD. Coordinators: Ashley Grizzard, Lisa Navarro.

**University of Kentucky Department of Ophthalmology, Lexington, KY (34).** Investigators: Woodford Van Meter, MD (PI), Douglas Katz, MD. Coordinators: Judy Beck, Lakisha Jeffries, Toni Scoggins, Jane Webb.

**Minnesota Eye Consultants, Bloomington, MN (33).** Investigators: David Hardten, MD (PI), Marlane Brown, OD, Ahmad Fahmy, OD, Mona Fahmy, OD, Benjamin Fogal, OD, Scott Hauswirth, OD, Richard Lindstrom, MD, Sherman Reeves, MD. Coordinators: Alex Belsaas, Lindsey Fallenstein, Sara Mork, Amanda Stehly, Joshua Tisdell.

**Ophthalmic Partners of PA, P.C., Bala Cynwyd, PA (32).** Investigators: Irving Raber, MD (PI), Brandon Ayres, MD. Coordinators: Samantha Campbell, Gordon Drever, Cathy Petrocella, Irene Spanelis.

**Cincinnati Eye Institute, Cincinnati, OH, (31).** Investigator: Michael Nordlund MD, PhD (PI). Coordinators: Jen Bradford, Tracy Cruz.

**University of Illinois Chicago Eye and Ear Infirmary, Chicago, IL (31).** Investigators: Elmer Tu, MD (PI), Ali Djalilian, MD, Maria Soledad Cortina, MD. Coordinator: Marie Dolores Byrne.

**Northshore University Health System, Glenview, IL (26).** Investigators: Marian Macsai, MD (PI), Joshua Herz, MD. Coordinators: Vicenta Martinez, Mira Shiloach.

**Medical Eye Center, Medford, OR (25).** Investigator: Matthew Oliva, MD (PI). Coordinators: Heather Smith, Toni Wild.

**The Wilmer Eye Institute/Johns Hopkins, Baltimore, MD (25).** Investigators: Yassine Daoud, MD (PI), Oliver Schein, MD, Walter Stark, MD. Coordinators: Holly Brown, Kaitlyn Hodges, Mary LoValvo, Regina Morgan, Kimberly Pratzner, Stacey Seabrook, Nadia Wong.

**Mayo Clinic, Rochester, MN (23).** Investigators: Sanjay Patel, MD (PI), Keith Baratz, MD. Coordinators: JaMario Ayers, Melissa Franzen, Rebecca Nielsen, Heidi Rubin, Diane Vogen.

**University of Utah, Moran Eye Center, Salt Lake City, UT (23).** Investigator: Mark Mifflin, MD (PI). Coordinators: Katie Farnsworth, Deborah Harrison.

**Sadeer Hannush PC, Langhorne, PA (22).** Investigator: Sadeer Hannush, MD (PI). Coordinators: Brian Sperling, Lisa Sperling.

**The Ohio State University Wexner Medical Center- Havener Eye Institute, Columbus, OH (19).** Investigators: Thomas Mauger, MD (PI), Andrew Hendershot, MD, Rebecca Kuennen, MD. Coordinators: Dana Doneski, Deniz Eren, Meredith Hiltbrand Andrea Inman Jonda Leser, Sara Oravec, Christopher Petec, Demarcus Williams.

**Keck Medical Center of USC-Ophthalmology, Los Angeles, CA, (18).** Investigators: Jonathan Song (PI), Neda Shamie, MD, J. Martin Heur, MD. Coordinators: Grace Chon, John Gil-Flamer, Yoon Hee Kim, Margaret Padilla, Amelia Weldon.

**Ophthalmic Consultants of Boston, Boston, MA (16).** Investigators: Michael Raizman, MD (PI), Nicoletta Fynn-Thompson, MD, Peter Rapoza, MD. Coordinators: Harrison Bannett, Emily Beem, Joanne Berry, Tina Callina, Amanda Campbell, Allison Coombs, Samantha Hulbert, Jennifer Moro Brent Richardson, Kimberly Santos, Angell Shi.

**Bascom Palmer Eye Institute, Miami, FL (15).** Investigators: Sonia Yoo, MD (PI), Michael Banitt, MD, Kendall Donaldson, MD, Carol Karp, MD. Coordinators: Maria Esquiabro, Ailen Gutierrez, Janika San Roman, Martha Tello, Ruth Vanderbrook, Patrick Waren.

**Stein Eye Institute, University of California, Los Angeles, CA (14).** Investigators: Anthony Aldave, MD (PI), Sophie Deng, MD. Coordinators: Marianne Bernardo, Zach Fenoglio, Serina Gonzales, Ellen Haupt, Mathew Margolis, Elaine Ngo.

**Eye Care of San Diego, San Diego, CA (13).** Investigator: John Bokosky, MD (PI). Coordinators: Jennifer Manke, Tracee McCoy, Mallory Moreno, Natasha Ozerskiy, Deborah Rodriguez.

**New York Eye and Ear Infirmary, New York, NY (13).** Investigators: John Seedor, MD (PI), David Ritterband, MD, Elaine Wu, MD. Coordinator: Alice Hong, Kristen Fry Yvonne Lyons, Katy Tai.

**Eye Consultants of Maryland, Owings Mills, MD (12).** Investigators: Verinder Nirankari, MD (PI), Jennifer Nottage, MD. Coordinator: William Bolt.

**Corneal Associates, PC, Wills Eye Institute, Philadelphia, PA (11).** Investigators: Kristin Hammersmith, MD (PI), Parveen Nagra, MD, Christopher Rapuano, MD. Coordinator: Megan DiLeo, William Garvey, Michael Lindsay, Sara Rapuano.

**Cornea Consultants of Albany, Slingerlands, NY (11).** Investigators: Robert Schultze, MD (PI), Robert Eden, MD. Coordinators: Katherine Cavanaugh, Joelle Rifenburg, Kamil San, Alice Titova.

**University Hospitals Cleveland Medical Center, Cleveland, OH (9).** Investigators: Pankaj Gupta, MD (PI), Kristina Thomas, MD. Coordinators: Lisa Ferguson, Sangeetha Raghupathy, Jessica Tag, Kalisha Washington.

**Woolfson Eye Institute, Atlanta, GA (9).** Investigator: R. Doyle Stulting, MD, PhD (PI), Coordinators: Jane Bryant, Deborah DiChiara, Aubrey Kirchner, Jodi Miller, Jesand Sylve.

**Eye Consultants of Atlanta, Atlanta, GA (8).** Investigator: W. Barry Lee, MD (PI). Coordinators: Kimberly Harber, Teresa Long.

**University of Iowa Hospitals and Clinics, Iowa City, IA (8).** Investigators: Kenneth Goins, MD (PI), Mark Greiner, MD, Anna Kitzmann, MD, Michael Wagoner, MD, PhD. Coordinators: Tammy Burdick, Constance Mullinnix.

**Ophthalmology Associates, St. Louis, MT (7).** Investigators: Gregg Berdy, MD (PI), Robert Brusatti, OD, Ranjan Malhotra, MD. Coordinators: Debi Gravemann, Jill Montgomery, Diane Sanders, Amy Young.

**Center for Sight, Sarasota, Florida, (7).** Investigators: William Lahners, MD (PI), James Lenhart, OD, Kyle Schaub, MD. Coordinators: Karen Hagin, Jamie Leeper, Tina Maler, Ginger Moritz, Gisela Santiago, Dawn Satterlee, Alyssa Willard.

**University of California - San Francisco, San Francisco, CA (3).** Investigators: Jennifer Rose-Nussbaumer, MD (PI), Bennie Jeng, MD. Coordinators: Ariana Austin, Puja Cuddapah, Dionna Fry, Alexandra Neiman, Cissy Yang.

## **Eye Banks**

Listed in order of number of eyes enrolled in the CPTS are the eye banks with name, city, state, number of eyes in parentheses, and names of the principal investigators.

**Eversight Michigan (formerly Midwest Eye-Banks Michigan), Ann Arbor, MI (226).** Kristen McCoy

**Gift of Life Donor Program Eye Bank, Hershey, PA (220).** Nai Liang

**KeraLink International (formerly Tissue Banks International), Baltimore, MD (132).** Sameera Farazdaghi

**Eversight Illinois (formerly Midwest Eye-Banks Illinois), Chicago, IL (88).** Kristen McCoy

**Sightlife, Seattle, WA (68).** Caroline K. Hoover.

**University of Texas Southwestern, Dallas, TX (66).** Donna Drury

**Lions Eye Bank of Delaware Valley, Philadelphia, PA (65).** Gregory Dorn  
**Eversight Ohio (formerly Cleveland Eye Bank), Cleveland, OH (61).** Kristen McCoy  
**Minnesota Lions Eye Bank, St. Paul, MN (56).** Veronique Grimes  
**Lions VisionGift, Portland, OR (51).** Chris G. Stoeger  
**Saving Sight, Kansas City, MO (47).** Deborah Van Klinken  
**Lions Eye Bank of Wisconsin, Madison, WI (41).** Mikelanne Schipper (now with Lions Eye Institute for Transplant & Research)  
**Iowa Lions Eye Bank, Coralville, IA (34).** Gregory Schmidt  
**Lions Eye Bank of Lexington, Lexington, KY (34).** Patrick Haley  
**Cincinnati Eye Bank, Cincinnati, OH (31).** Tina Mays  
**Utah Lions Eye Bank, Salt Lake City, UT (23).** Wade McEntire  
**Georgia Eye Bank, Atlanta, GA (17).** Eric Meinecke  
**Florida Lions Eye Bank, Miami, FL (14).** Elizabeth Fout-Caraza.  
**San Diego Eye Bank, San Diego, CA (13).** Jeffrey G. Penta  
**Eye Bank for Sight Restoration, New York, NY (13).** Patricia Dahl  
**Miracles in Sight (formerly North Carolina Eye Bank), Winston-Salem, NC (12).** Michael Tramber  
**Lions Eye Bank at Albany, Albany, NY (11).** Victoria Adler  
**Lions Eye Institute for Transplant & Research, Tampa, FL (7).** Patrick Gore (now with Saving Sight), Wilfred Caraballo

**Study Chair's Office, Case Western Reserve University and University Hospitals Eye Institute, Cleveland, OH.** Jonathan H. Lass, MD (Study Chair), Helen Novotney, April Scorzino.

**Coordinating Center, Case Western Reserve University and University Hospitals Eye Institute, Cleveland, OH.** Loretta B. Szcotka-Flynn, OD, PhD (Director), Michelle Corrigan, Neda Farooqi, Lisa Ferguson, Lori Karpinecz, Michael Payne, Leslie Richards, Tatiana Riedel, Jessica Tag, Kalisha Washington.

**Cornea Image Analysis Reading Center, Case Western Reserve University and University Hospitals Eye Institute, Cleveland, OH.** Jonathan H. Lass, MD (Medical Director), Beth Ann Benetz, MA (Technical Director), Glenn Barton, Andrew Bear, Le'Rashaun Jones, Lori Karpinecz, Michele Kit, Mark Madere, Harry Menegay, PhD, Tanisha Rankins-Coker, Garth Wadleigh.

**Data Management and Analysis Center, Jaeb Center for Health Research, Tampa, FL.** Roy W. Beck, MD, PhD (Executive Director), Allison R. Ayala, MS (DMAC Director), Kenneth Arcieri, Darrell S. Austin, Daphne M. Auza, Mitchell Dupre, Amber Evans, Robin L. Gal, MSPH, Craig Kollman, PhD, Nadine E. Labell, Wendi Liang, MSPH, Alandra S. Powe MSPH.

**Operations Committee.** Jonathan H. Lass, MD (Chair), Allison R. Ayala, MS, Roy W. Beck, MD, PhD, Beth Ann Benetz, MA, Robin L. Gal, MSPH, Maryann Redford, DDS, MPH, Loretta B. Szcotka-Flynn, OD, PhD

**Executive Committee.** Jonathan H. Lass, MD (Chair), Anthony J. Aldave MD, Allison R. Ayala, MS, Roy W. Beck, MD, PhD, Beth Ann Benetz, MA, Michelle M. Corrigan, Steven P. Dunn, MD, Robin L. Gal, MSPH, Ty L. McCall MD, Lisa Navarro, Sudeep Pramanik, MD, Maryann Redford, DDS, MPH, Kevin W. Ross, MS, MPH, George O. Rosenwasser, MD, Loretta B. Szczotka-Flynn, OD, PhD, Mark A. Terry MD, David T. Verdier, MD

**Eye Bank Advisory Committee:** Kevin W. Ross, MS MPH (Chair), Patricia Dahl, Donna C. Drury, Sameera M. Farazdaghi, Caroline K. Hoover, Jeffery G. Penta, Mark C. Soper, Chris G. Stoeger, Doyce V. Williams

**Data and Safety Monitoring Committee**

David C. Musch, PhD, MPH (DSMC Chair), William Bourne, MD, Kathryn A. Colby, MD, PhD, Marian Fisher, PhD, Rabbi Samuel Fishman, Maryann Redford, DDS, MPH

**National Institutes of Health: National Eye Institute, Bethesda, MD.** Maryann Redford, DDS, MPH, Steven Oversby, PsyD

## **eAppendix 2. Institutional Review Boards**

Dean Institutional Review Board

Icahn Mount Sinai School of Medicine Institutional Review Board / New York Eye and Ear Infirmary of Mount Sinai Institutional Review Board

Johns Hopkins Institutional Review Board

Legacy Institutional Review Board

Mayo Clinic Institutional Review Board

Mercy Institutional Review Board

North Shore University Health System Institutional Review Board

The Ohio State University Biomedical Institutional Review Board

University Hospitals Cleveland Medical Center Institutional Review Board

University of California Los Angeles Institutional Review Board

University of California San Francisco Institutional Review Board

University of Illinois at Chicago Institutional Review Board

University of Iowa Institutional Review Board

University of Kentucky Institutional Review Board

University of Miami Institutional Review Board

University of Michigan Medical School Institutional Review Board

University of Southern California Health Sciences Campus Institutional Review Board

University of Utah Institutional Review Board

Wills Eye Hospital Institutional Review Board

**eTable 1. Quality Control Repeat Grading Results<sup>a</sup>**

| Difference between re-grades vs originals                                  | All visits   |              |              | By visit (Overall only, i.e. combining round 1 and round 2) |              |              |              |             |
|----------------------------------------------------------------------------|--------------|--------------|--------------|-------------------------------------------------------------|--------------|--------------|--------------|-------------|
|                                                                            | Overall      | Round 1      | Round 2      | Pre-op                                                      | 6M           | 12M          | 24M          | 36M         |
|                                                                            | N = 430      | N = 215      | N = 215      | N = 100                                                     | N = 86       | N = 90       | N = 86       | N = 68      |
| <b>Mean (SD) [Range]</b>                                                   | 3 (3) [0-19] | 3 (3) [0-18] | 3 (3) [0-19] | 3 (4) [0-19]                                                | 3 (3) [0-14] | 2 (2) [0-11] | 2 (3) [0-14] | 1 (1) [0-6] |
| <b>n (%) of re-grades consistently non-analyzable</b>                      | 3 (1%)       | 1 (<1%)      | 2 (1%)       | 2 (2%)                                                      | 0            | 0            | 0            | 1 (1%)      |
| <b>n (%) of re-grades &lt;5% different</b>                                 | 370 (86%)    | 190 (88%)    | 180 (84%)    | 78 (78%)                                                    | 70 (81%)     | 79 (88%)     | 79 (92%)     | 64 (94%)    |
| <b>n (%) of re-grades 5-10% different</b>                                  | 39 (9%)      | 15 (7%)      | 24 (11%)     | 14 (14%)                                                    | 10 (12%)     | 8 (9%)       | 5 (6%)       | 2 (3%)      |
| <b>n (%) of re-grades &gt;10% different</b>                                | 14 (3%)      | 7 (3%)       | 7 (3%)       | 6 (6%)                                                      | 4 (5%)       | 2 (2%)       | 2 (2%)       | 0           |
| <b>n (%) of re-grades resulting in inconsistent gradability assessment</b> | 4 (1%)       | 2 (1%)       | 2 (1%)       | 0                                                           | 2 (2%)       | 1 (1%)       | 0            | 1 (1%)      |

<sup>a</sup> 7 Quality control image sets were flagged for a separate masked outlier review process, 4 of which resulted in regrading



**eTable 2. Baseline Recipient Characteristics in Eyes with Graft Success<sup>a</sup>**

|                                                                                                                                  | Preservation Time Group |                      |
|----------------------------------------------------------------------------------------------------------------------------------|-------------------------|----------------------|
|                                                                                                                                  | 0-7 Days<br>(N=485)     | 8-14 Days<br>(N=460) |
| <b>Age when Patient Enrolled<sup>b</sup> (years) – Median (IQR)</b>                                                              | 70 (64, 76)             | 70 (64, 76)          |
| <b>Gender: Women - n (%)</b>                                                                                                     | 296 (61)                | 279 (61)             |
| <b>Race/Ethnicity - n (%)</b>                                                                                                    |                         |                      |
| White                                                                                                                            | 451 (93)                | 428 (93)             |
| African-American                                                                                                                 | 11 (2)                  | 12 (3)               |
| Hispanic or Latino                                                                                                               | 13 (3)                  | 15 (3)               |
| Asian                                                                                                                            | 4 (<1)                  | 1 (<1)               |
| American Indian/Alaskan Native                                                                                                   | 0                       | 0                    |
| More than one race                                                                                                               | 4 (<1)                  | 3 (<1)               |
| Unknown/Not Reported                                                                                                             | 2 (<1)                  | 1 (<1)               |
| <b>History of diabetes<sup>c</sup>- n (%)</b>                                                                                    | 70 (14)                 | 73 (16)              |
| <b>Current cigarette smoker<sup>c</sup>- n (%)</b>                                                                               | 23 (5)                  | 23 (5)               |
| <b>Received any immunizations or vaccinations in last 3 months<sup>c</sup>- n (%)</b>                                            | 59 (12)                 | 51 (11)              |
| <b>Study Eye Characteristics</b>                                                                                                 |                         |                      |
| <b>Prior glaucoma surgery- n (%)</b>                                                                                             | 10 (2)                  | 11 (2)               |
| <b>Glaucoma medications currently being used - n (%)</b>                                                                         | 28 (6)                  | 32 (7)               |
| <b>Diagnosis- n (%)</b>                                                                                                          |                         |                      |
| PCE without FECD                                                                                                                 | 24 (5)                  | 14 (3)               |
| ACE without FECD                                                                                                                 | 0                       | 0                    |
| FECD <sup>1,2</sup>                                                                                                              | 461 (95)                | 446 (97)             |
| Grade 0 <sup>3</sup>                                                                                                             | 1 (<1)                  | 1 (<1)               |
| 1                                                                                                                                | 0                       | 0                    |
| 2                                                                                                                                | 2 (<1)                  | 2 (<1)               |
| 3                                                                                                                                | 7 (1)                   | 9 (2)                |
| 4                                                                                                                                | 57 (12)                 | 58 (13)              |
| 5                                                                                                                                | 146 (30)                | 138 (30)             |
| 6                                                                                                                                | 248 (51)                | 238 (52)             |
| <b>Evidence of a corneal abnormality other than FECD- n (%)</b>                                                                  |                         |                      |
| No                                                                                                                               | 451 (93)                | 436 (95)             |
| Posterior Polymorphous                                                                                                           | 0                       | 0                    |
| Keratoconus                                                                                                                      | 1 (<1)                  | 0                    |
| EBMD                                                                                                                             | 28 (6)                  | 22 (5)               |
| Other                                                                                                                            | 5 (1)                   | 2 (<1)               |
| <b>Stromal corneal vessels present (but <u>not</u> visually significant) - n (%)</b>                                             | 1 (<1)                  | 1 (<1)               |
| <b>Central subepithelial or stromal scarring present (but could <u>not</u> impact postop stromal clarity assessment) - n (%)</b> | 20 (4)                  | 29 (6)               |
| <b>Peripheral anterior synechiae present (non-gonioscopic)-n (%)</b>                                                             | 2 (<1)                  | 1 (<1)               |
| <b>Pre-operative lens status - n (%)</b>                                                                                         |                         |                      |
| Phakic                                                                                                                           | 251 (52)                | 265 (58)             |
| Aphakic                                                                                                                          | 0                       | 0                    |
| Pseudophakic PC IOL                                                                                                              | 234 (48)                | 195 (42)             |
| <b>Post-operative lens status - n (%)</b>                                                                                        |                         |                      |
| Phakic                                                                                                                           | 3 (<1)                  | 2 (<1)               |
| Pseudophakic PC IOL                                                                                                              | 482 (99)                | 458 (99)             |
| <b>IOP (mm Hg) – Median (IQR)</b>                                                                                                | 14 (12, 17)             | 14 (12, 17)          |

Abbreviations: FECD: Fuchs' endothelial corneal dystrophy; PCE: Pseudophakic corneal edema; ACE: Aphakic corneal edema; PC IOL: Posterior chamber intraocular lens; EBMD: epithelial basement membrane dystrophy

<sup>a</sup> Includes eyes with graft success at 3 years and gradable image at 3 years (i.e., the primary ECD analysis cohort).

<sup>b</sup> If participant had 2 study eyes, the data collected at time of enrollment of first eye are counted in both columns.

<sup>c</sup> These patient-level questions were repeated at the time of enrollment of the second eye, so the answers could differ from one eye to the next.

**eTable 3. CPTS Donor Characteristics in Eyes with Graft Success<sup>a</sup>**

|                                            | Preservation Time Group |                    |
|--------------------------------------------|-------------------------|--------------------|
|                                            | 0-7 Days<br>N=485       | 8-14 Days<br>N=460 |
| <b>Donor age (years)</b>                   |                         |                    |
| <=30                                       | 20 (4)                  | 33 (7)             |
| 31-50                                      | 82 (17)                 | 66 (14)            |
| 51-60                                      | 129 (27)                | 112 (24)           |
| 61-70                                      | 188 (39)                | 177 (38)           |
| 71-76                                      | 66 (14)                 | 72 (16)            |
| <i>Median (IQR)</i>                        | 61 (52, 67)             | 61 (52, 67)        |
| <b>Gender: Women- n (%)</b>                | 174 (36)                | 162 (35)           |
| <b>Race/Ethnicity - n (%)</b>              |                         |                    |
| White                                      | 418 (86)                | 406 (88)           |
| African-American                           | 26 (5)                  | 25 (5)             |
| Hispanic or Latino                         | 27 (6)                  | 23 (5)             |
| Asian                                      | 5 (1)                   | 3 (<1)             |
| American Indian/Alaskan Native             | 2 (<1)                  | 0                  |
| More than one race                         | 0                       | 0                  |
| Native Hawaiian/Other Pacific Islander     | 2 (<1)                  | 0                  |
| Unknown/Not Reported                       | 5 (1)                   | 3 (<1)             |
| <b>History of diabetes: Yes- n (%)</b>     | 127 (26)                | 120 (26)           |
| <b>Cause of death- n (%)</b>               |                         |                    |
| Cancer                                     | 90 (19)                 | 82 (18)            |
| Cardiovascular Disease                     | 198 (41)                | 163 (35)           |
| Cerebrovascular Accident                   | 49 (10)                 | 53 (12)            |
| Drug Overdose                              | 8 (2)                   | 11 (2)             |
| Motor Vehicle Accident                     | 20 (4)                  | 23 (5)             |
| Organ Failure                              | 11 (2)                  | 15 (3)             |
| Pulmonary Embolism                         | 22 (5)                  | 13 (3)             |
| Respiratory Disease                        | 33 (7)                  | 34 (7)             |
| Other Trauma                               | 22 (5)                  | 22 (5)             |
| Other                                      | 32 (7)                  | 44 (10)            |
| <b>How time of death determined- n (%)</b> |                         |                    |
| Last known alive                           | 32 (7)                  | 26 (6)             |
| Pronounced                                 | 429 (88)                | 406 (88)           |
| Cross-clamp                                | 23 (5)                  | 28 (6)             |
| Established by core temperature            | 1 (<1)                  | 0                  |
| <b>Method of retrieval- n (%)</b>          |                         |                    |
| In situ                                    | 481 (99)                | 460 (100)          |
| Whole globe                                | 4 (<1)                  | 0                  |
| <b>Refrigerated / On Ice: Yes- n (%)</b>   | 439 (91)                | 411 (89)           |
| <b>Storage solution- n (%)</b>             |                         |                    |
| Life 4°C                                   | 22 (5)                  | 16 (3)             |
| Optisol GS                                 | 463 (95)                | 444 (97)           |
| <b>Folds severity: - n (%)</b>             |                         |                    |
| None                                       | 101 (21)                | 86 (19)            |
| Mild                                       | 315 (65)                | 315 (68)           |
| Moderate                                   | 69 (14)                 | 59 (13)            |
| <b>Pleomorphism /Polymegethism- n (%)</b>  |                         |                    |
| None                                       | 351 (72)                | 336 (73)           |
| Mild                                       | 132 (27)                | 122 (27)           |
| Moderate                                   | 2 (<1)                  | 2 (<1)             |

|                                                                                                                                                   |              |              |
|---------------------------------------------------------------------------------------------------------------------------------------------------|--------------|--------------|
| <b>Screening endothelial cell density</b> — <i>cells/mm<sup>2</sup></i>                                                                           |              |              |
| Mean (SD)                                                                                                                                         | 2746 (297)   | 2723 (284)   |
| [Min, Max]                                                                                                                                        | [2300, 3888] | [2304, 3663] |
| <b>Lamellar dissection performed by-</b> <i>n (%)</i>                                                                                             |              |              |
| Eye Bank                                                                                                                                          | 342 (71)     | 326 (71)     |
| Surgeon                                                                                                                                           | 143 (29)     | 134 (29)     |
| <b>Pre-operative endothelial cell density</b> - For subset of corneas that were eye bank prepared (image obtained just after lamellar dissection) |              |              |
| Mean (SD)                                                                                                                                         | 2749 (370)   | 2778 (386)   |
| [Min, Max]                                                                                                                                        | [1840,4793]  | [970,4243]   |
| <b>Pre-operative endothelial cell density</b> - For subset of corneas that were surgeon prepared (image obtained just prior to shipping)          |              |              |
| Mean (SD)                                                                                                                                         | 2736 (315)   | 2731 (344)   |
| [Min, Max]                                                                                                                                        | [2057,3577]  | [1660,3759]  |
| <b>Death to preservation time</b> – <i>hours</i>                                                                                                  |              |              |
| Median (IQR)                                                                                                                                      | 10 (7,14)    | 10 (7,14)    |
| [Min, Max]                                                                                                                                        | [0,20]       | [0,22]       |

---

<sup>a</sup> Includes eyes with graft success at 3 years and gradable image at 3 years (i.e., the primary ECD analysis cohort)

**eTable 4. Four Year Endothelial Cell Density (cells/mm<sup>2</sup>) in Eyes with Graft Success<sup>a</sup>**

|                                   | N   | Mean Screening ECD (SD) | Mean Preoperative <sup>b</sup> ECD (SD) | Mean Year ECD (SD) | Mean Percent ECL from Screening to 4 Year (SD) | P-value for 4 Year ECD |
|-----------------------------------|-----|-------------------------|-----------------------------------------|--------------------|------------------------------------------------|------------------------|
| <b>Overall</b>                    | 412 | 2731 (277)              | 2794 (354)                              | 1578 (679)         | 43 (23)                                        |                        |
| <b>Preservation Time Group</b>    |     |                         |                                         |                    |                                                | .04 <sup>c</sup>       |
| <b>0-7 days</b>                   | 203 | 2728 (280)              | 2770 (323)                              | 1620 (673)         | 41 (23)                                        |                        |
| <b>8-14 days</b>                  | 209 | 2734 (275)              | 2817 (381)                              | 1537 (683)         | 44 (23)                                        |                        |
| <b>Preservation Time Subgroup</b> |     |                         |                                         |                    |                                                | .07 <sup>d</sup>       |
| <b>0-4 days</b>                   | 54  | 2757 (260)              | 2809 (371)                              | 1637 (719)         | 41 (24)                                        |                        |
| <b>5-7 days</b>                   | 149 | 2718 (288)              | 2756 (305)                              | 1614 (658)         | 41 (23)                                        |                        |
| <b>8-11 days</b>                  | 135 | 2753 (287)              | 2810 (373)                              | 1610 (700)         | 42 (24)                                        |                        |
| <b>12-14 days</b>                 | 74  | 2699 (249)              | 2829 (397)                              | 1404 (635)         | 49 (22)                                        |                        |
| <b>Preservation Time (Days)</b>   |     |                         |                                         |                    |                                                | .009 <sup>e</sup>      |
| <b>0-3</b>                        | 23  | 2741 (271)              | 2710 (378)                              | 1851 (651)         | 32 (23)                                        |                        |
| <b>4</b>                          | 31  | 2768 (255)              | 2883 (354)                              | 1478 (736)         | 47 (23)                                        |                        |
| <b>5</b>                          | 44  | 2765 (303)              | 2717 (341)                              | 1651 (581)         | 40 (20)                                        |                        |
| <b>6</b>                          | 55  | 2681 (268)              | 2760 (300)                              | 1599 (667)         | 41 (24)                                        |                        |
| <b>7</b>                          | 50  | 2718 (294)              | 2788 (275)                              | 1596 (722)         | 42 (24)                                        |                        |
| <b>8</b>                          | 27  | 2805 (292)              | 2821 (281)                              | 1615 (670)         | 43 (20)                                        |                        |
| <b>9</b>                          | 43  | 2727 (307)              | 2768 (411)                              | 1614 (655)         | 41 (23)                                        |                        |
| <b>10</b>                         | 33  | 2803 (267)              | 2929 (399)                              | 1854 (795)         | 35 (26)                                        |                        |
| <b>11</b>                         | 32  | 2692 (272)              | 2730 (347)                              | 1348 (613)         | 49 (24)                                        |                        |
| <b>12</b>                         | 39  | 2761 (278)              | 2933 (429)                              | 1586 (662)         | 43 (21)                                        |                        |
| <b>13</b>                         | 27  | 2628 (206)              | 2684 (310)                              | 1266 (533)         | 52 (20)                                        |                        |
| <b>14</b>                         | 8   | 2638 (154)              | 2807 (383)                              | 980 (555)          | 63 (21)                                        |                        |

Abbreviations: ECD= Endothelial cell density; ECL=Endothelial cell loss

<sup>a</sup> Includes eyes with graft success at 4 years and a gradable image at 4 years

<sup>b</sup> Preoperative image ECD is missing for 4 and 6 eyes in this cohort, due to imaging not done or not gradable.

<sup>c</sup> The 4 year analysis model paralleled that of the primary 3 year outcome, i.e., a mixed linear model evaluating 4 year ECD as the dependent variable, adjusting for screening ECD and corneal diagnosis (pre-defined to include in the model regardless of significance), as well as storage solution, lamellar dissection preparation by eye bank versus surgeon, and accounting for correlated data from participants with 2 study eyes or 2 donor corneas from the same donor. Random surgeon effects were explored using a mixed linear model (p-value=.02 for PT effect)

<sup>d</sup> The same 4 year analysis model was used, except PT subgroups were analyzed as categorical. PT subgroups were also explored as ordinal, p-value=.04 and random surgeon effects were explored using a mixed linear model (p-value=.003 for PT effect).

<sup>e</sup> The same 4 year analysis model was used, except PT was analyzed as continuous. Random surgeon effects were explored using a mixed linear model (p-value=.001 for PT effect).

## eReferences

1. Lass JH, Szczotka-Flynn LB, Ayala AR, et al. Cornea Preservation Time Study: methods and potential impact on the cornea donor pool in the United States. *Cornea*. 2015;34(6):601-608.
2. Louttit MD, Kopplin LJ, Igo RP, Jr., et al. A multi-center study to map genes for Fuchs endothelial corneal dystrophy: baseline characteristics and heritability. *Cornea*. 2012;31(1):26-35.
3. Abbott RL, Fine BS, Webster J, R.G., Paglen PG, Spencer WH. Specular microscopic and histologic observations in nonguttate corneal endothelial degeneration. *Ophthalmology*. 1981;88(8):788-800.
